# Supplementary material
Source: PubMed Central journal article supplement (PMC7450510)
Supplement: ao0c01132_si_001.pdf [file ao0c01132_si_001.pdf]

---

**The combination of two bioactive constituents, lactoferrin and  
linolenic acid, inhibits mouse xenograft esophageal tumor  
growth by downregulating lithocholytaurine and inhibiting the  
JAK2/STAT3-related pathway**

Huiying Li,<sup>a,b,c,†</sup> Qianqian Yao,<sup>a,b,c,†</sup> Li Min,<sup>d</sup> Shengnan Huang,<sup>a,b,c</sup> Haoming  
Wu,<sup>a,b,c</sup> Huaigu Yang,<sup>a,b,c</sup> Linlin Fan,<sup>a,b,c</sup> Jiaqi Wang,<sup>a,b,c,\*</sup> Nan Zheng<sup>a,b,c,\*</sup>

**a Laboratory of Quality and Safety Risk Assessment for Dairy Products of  
Ministry of Agriculture and Rural Affairs, Institute of Animal Sciences, Chinese  
Academy of Agricultural Sciences, Beijing 100193, P. R. China**

**b Key Laboratory of Quality & Safety Control for Milk and Dairy Products of  
Ministry of Agriculture and Rural Affairs, Institute of Animal Sciences, Chinese  
Academy of Agricultural Sciences, Beijing 100193, P. R. China**

**c State Key Laboratory of Animal Nutrition, Institute of Animal Science,  
Chinese Academy of Agricultural Sciences, Beijing 100193, P. R. China**

**d State Key Laboratory of Livestock and Poultry Breeding, Institute of Animal  
Science, Guangdong Academy of Agricultural Sciences, Guangzhou 510640, P.  
R. China**

**† Huiying Li and Qianqian Yao should be regarded as the first author**

**\* Nan Zheng and Jiaqi Wang should be regarded as the corresponding author**

---

Corresponding author: Nan Zheng, Jia-Qi Wang, Chinese Academy of Agricultural Sciences, 2#  
Yuanmingyuan west road, Haidian district, Beijing, 100193, China

Tel: +86-10-62816069; Fax: +86-10-62897587

E-mail: [zhengnan\\_1980@126.com](mailto:zhengnan_1980@126.com), [jiaqi wang@vip.163.com](mailto:jiaqi wang@vip.163.com)

---

**Supplementary Table 1. Special metabolites screened by metabonomics detection**

---

| <b>No.</b> | <b>Name of metabolites</b>                                                          |
|------------|-------------------------------------------------------------------------------------|
| 1          | (2Z)-2-[(2-hydroxyphenyl)methylidene]octanal                                        |
| 2          | Tetrahydropersin                                                                    |
| 3          | 6-Hydroxyhexadecanoic acid                                                          |
| 4          | 8,11-Heptadecadienal                                                                |
| 5          | TG(22:6(4Z,7Z,10Z,13Z,16Z,19Z)/22:5(4Z,7Z,10Z,13Z,16Z)/22:6(4Z,7Z,10Z,13Z,16Z,19Z)) |
| 6          | CL(8:0/i-21:0/i-21:0/i-22:0)                                                        |
| 7          | CL(8:0/18:2(9Z,11Z)/i-21:0/i-21:0)                                                  |
| 8          | 1-Oleoylglycerophosphoinositol                                                      |
| 9          | 1-octadecylglycero-3-phosphocholine                                                 |
| 10         | 2-acetyl-1-alkyl-sn-glycero-3-phosphocholine                                        |
| 11         | LysoPE(20:1(11Z)/0:0)                                                               |
| 12         | 2-oleoyl-sn-glycero-3-phosphocholine                                                |
| 13         | LysoPI(18:0/0:0)                                                                    |
| 14         | LysoPC(P-18:0)                                                                      |
| 15         | Vinaginsenoside R1                                                                  |
| 16         | 33-Deoxy-33-hydroperoxyfurohyperforin                                               |
| 17         | Adenosine 3',5'-diphosphate                                                         |
| 18         | Orotidylic acid                                                                     |
| 19         | LysoSM(d18:1)                                                                       |
| 20         | Lithocholytaurine                                                                   |

---
